# Supplementary material for: A kinetically inert and optically active CrIII partner in thermodynamically self-assembled heterodimetallic non-covalent d–f podates
Source: Royal Society of Chemistry journal article supplement (doi:10.1039/b200011c), 2002-01-01
Supplement: b200011c-f1.doc [file b200011c-f1.doc]

Figure S1 Projection of the structure of 8 along the a direction showing the pseudo-hexagonal arrangement of the triple helices.
