# Supplementary material for: A kinetically inert and optically active CrIII partner in thermodynamically self-assembled heterodimetallic non-covalent d–f podates
Source: Royal Society of Chemistry journal article supplement (doi:10.1039/b200011c), 2002-01-01
Supplement: b200011c-f2.doc [file b200011c-f2.doc]

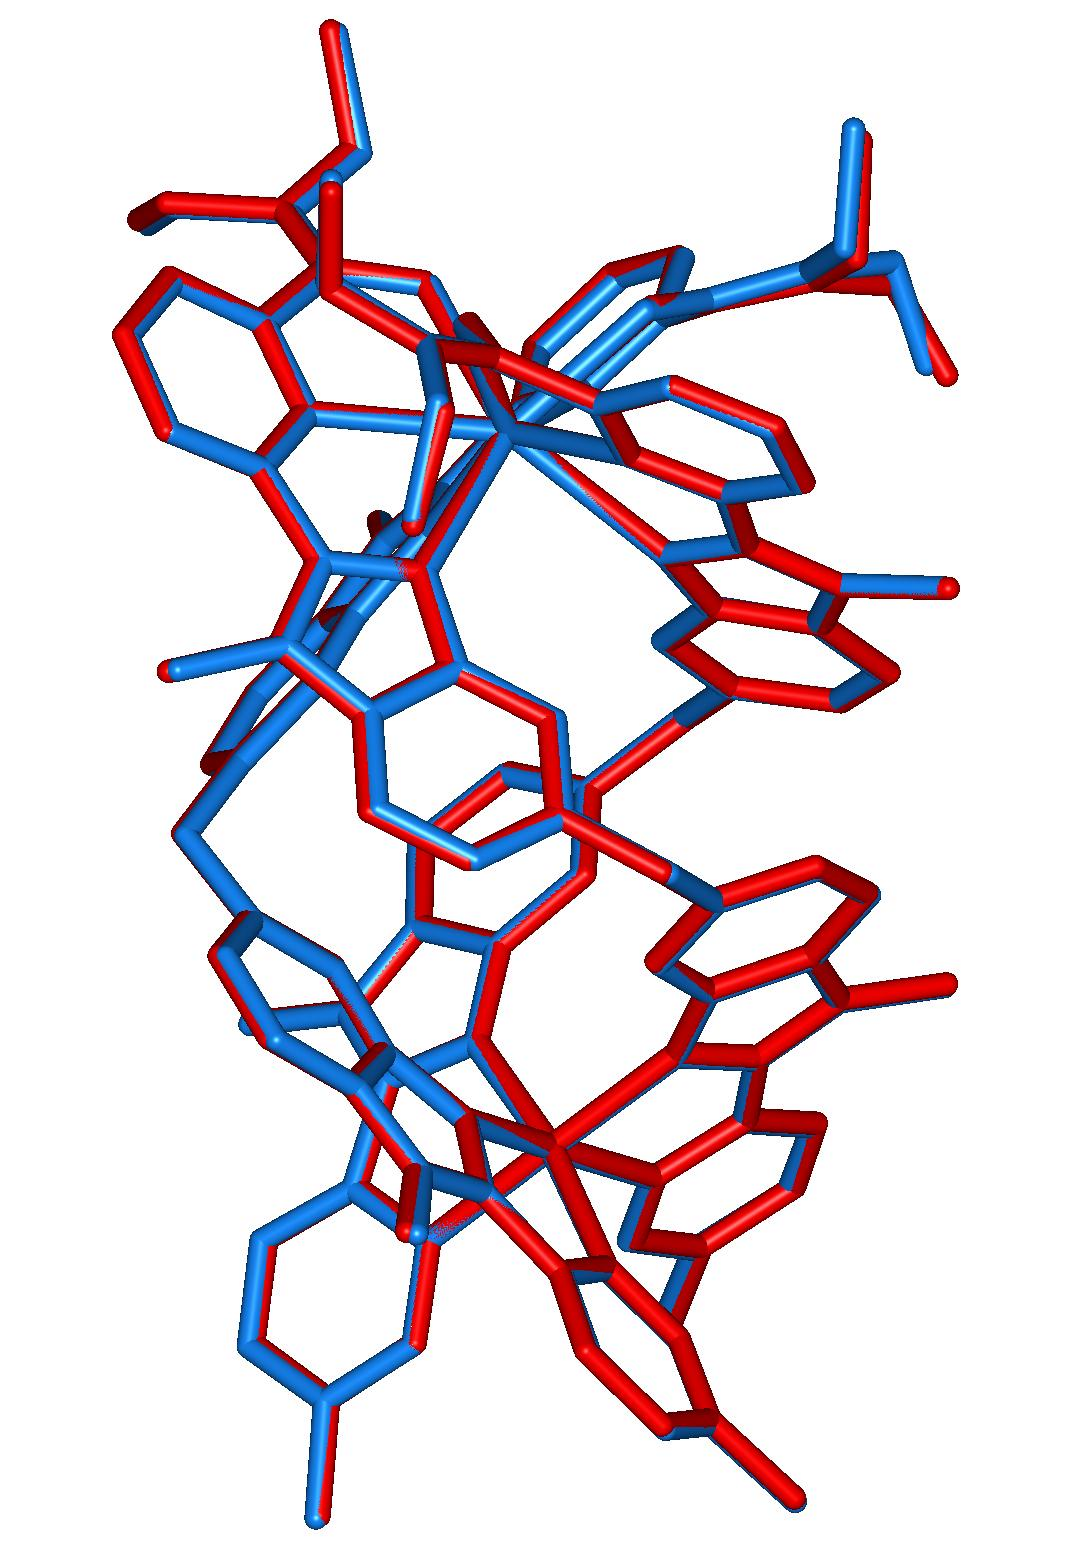


Figure S2 View of the molecular structure 7 (red) superimposed with the molecular structure of 8 (blue) in the same orientation.
