# Supplementary material for: A kinetically inert and optically active CrIII partner in thermodynamically self-assembled heterodimetallic non-covalent d–f podates
Source: Royal Society of Chemistry journal article supplement (doi:10.1039/b200011c), 2002-01-01
Supplement: b200011c-f3.doc [file b200011c-f3.doc]

#

Figure S3 Emission spectra of the complex (HHH)-[GdCrL3](CF3SO3)6.6H2O (3) in the temperature range 10-295 K.
