# Supplementary material for: A kinetically inert and optically active CrIII partner in thermodynamically self-assembled heterodimetallic non-covalent d–f podates
Source: Royal Society of Chemistry journal article supplement (doi:10.1039/b200011c), 2002-01-01
Supplement: b200011c-f4.doc [file b200011c-f4.doc]

Figure S4 Emission spectra of the complex (HHH)-[TbCrL3] ](CF3SO3)6.3H2O (4) in the temperature range 10-295 K.
