# Supplementary material for: A kinetically inert and optically active CrIII partner in thermodynamically self-assembled heterodimetallic non-covalent d–f podates
Source: Royal Society of Chemistry journal article supplement (doi:10.1039/b200011c), 2002-01-01
Supplement: b200011c-f5.doc [file b200011c-f5.doc]

Figure S5 Lifetime of the Cr(2E) excited level (ms) in [LnCrIIIL3](CF3SO3)6.mH2O (Ln = Eu, m = 4: 2; Ln = Gd, *m* = 6: 3; Ln = Tb, *m* = 3: 4) versus temperature in the range 10-295 K.
