# Supplementary material for: A kinetically inert and optically active CrIII partner in thermodynamically self-assembled heterodimetallic non-covalent d–f podates
Source: Royal Society of Chemistry journal article supplement (doi:10.1039/b200011c), 2002-01-01
Supplement: b200011c-s1.doc [file b200011c-s1.doc]

*Table S1 Molecular peaks for complexes (HHH)-[LnCrIIIL3]6+ and adduct ions observed by ESI-MS (total ligand concentration 3.10-4 mole.dm-3 in acetonitrile).*

| Metal | Cation | m/z*a* | Metal | Cation | m/z*a* |
| --- | --- | --- | --- | --- | --- |
| Ln = LaIII | [LaCrL3]6+ | 303.8 |  | [CrL3(CF3SO3)]2+ | 915.9 |
|  | [LaCrL3(CF3SO3)]5+ | 394.2 | Ln = TbIII | [TbCrL3]6+ | 307.0 |
|  | [LaCrL3(CF3SO3)2]4+ | 529.9 |  | [TbCrL3(CF3SO3)]5+ | 398.2 |
|  | [LaCrL3(CF3SO3)3]3+ | 756.4 |  | [TbCrL3(CF3SO3)2]4+ | 535.0 |
|  | [LaCrL3(CF3SO3)4]2+ | 1209.0 |  | [TbCrL3(CF3SO3)3]3+ | 763.0 |
|  | [CrL3]3+ | 560.9 |  | [TbCrL3(CF3SO3)4]2+ | 1218.7 |
|  | [CrL3(CF3SO3)]2+ | 915.9 |  | [TbCrL2(CF3SO3)3]3+ | 581.7 |
| Ln = EuIII | [EuCrL3]6+ | 305.6 |  | [TbCrL2(CF3SO3)4]2+ | 947.1 |
|  | [EuCrL3(CF3SO3)]5+ | 396.8 | Ln = TmIII | [TmCrL3]6+ | 308.8 |
|  | [EuCrL3(CF3SO3)2]4+ | 533.4 |  | [TmCrL3(CF3SO3)]5+ | 400.3 |
|  | [EuCrL3(CF3SO3)3]3+ | 760.6 |  | [TmCrL3(CF3SO3)2]4+ | 537.7 |
|  | [EuCrL3(CF3SO3)4]2+ | 1215.6 |  | [TmCrL3(CF3SO3)3]3+ | 766.5 |
|  | [EuCrL2(CF3SO3)3]3+ | 579.5 |  | [TmCrL3(CF3SO3)4]2+ | 1224.0 |
|  | [EuCrL2(CF3SO3)4]2+ | 943.8 |  | [TmCrL2(CF3SO3)3]3+ | 585.0 |
| Ln = GdIII | [GdCrL3]6+ | 306.8 |  | [TmCrL2(CF3SO3)4]2+ | 952.2 |
|  | [GdCrL3(CF3SO3)]5+ | 398.0 | Ln = LuIII | [LuCrL3]6+ | 309.6 |
|  | [GdCrL3(CF3SO3)2]4+ | 534.6 |  | [LuCrL3(CF3SO3)]5+ | 401.4 |
|  | [GdCrL3(CF3SO3)3]3+ | 762.1 |  | [LuCrL3(CF3SO3)2]4+ | 539.0 |
|  | [GdCrL3(CF3SO3)4]2+ | 1217.9 |  | [LuCrL3(CF3SO3)3]3+ | 768.2 |
|  | [GdCrL2(CF3SO3)3]3+ | 581.1 |  | [LuCrL3(CF3SO3)4]2+ | 1226.7 |
|  | [GdCrL2(CF3SO3)4]2+ | 946.4 |  | [LuCrL2(CF3SO3)3]3+ | 586.8 |
|  | [CrL3]3+ | 561.0 |  | [LuCrL2(CF3SO3)4]2+ | 954.9 |

*a* m/z values given for the maximum of the peak.
