# Supplementary material for: A kinetically inert and optically active CrIII partner in thermodynamically self-assembled heterodimetallic non-covalent d–f podates
Source: Royal Society of Chemistry journal article supplement (doi:10.1039/b200011c), 2002-01-01
Supplement: b200011c-s2.doc [file b200011c-s2.doc]

**Table S2**. Elemental Analyses for Complexes [LnCrL3](CF3SO3)6.mH2O (Ln = La, m = 2,: 1; Ln = Eu, m = 4: **2**; Ln = Gd, *m* = 6: **3**; Ln = Tb, *m* = 3: **4**; Ln = Tm, *m* = 4: **5**; Ln = Lu, *m* = 2: **6**) and [CrL3](CF3SO3)6.8H2O (9). Calculated Values are Given in Parentheses.

| Compd | %C | %H | %N |
| --- | --- | --- | --- |
| **1** | 45.74 (45.82) | 3.77 (3.77) | 10.69 (10.69) |
| **2** | 45.03 (45.02) | 3.92 (3.85) | 10.45 (10.50) |
| **3** | 44.26 (44.36) | 3.98 (3.94) | 10.33 (10.35) |
| **4** | 45.22 (45.19) | 4.03 (3.79) | 10.45 (10.54) |
| **5** | 44.80 (44.75) | 3.93 (3.83) | 10.41 (10.44) |
| **6** | 45.15 (45.23) | 3.82 (3.73) | 10.53 (10.55) |
| **9** | 53.91 (53.86) | 4.86 (5.10) | 12.71 (12.93) |
