# Supplementary material for: A kinetically inert and optically active CrIII partner in thermodynamically self-assembled heterodimetallic non-covalent d–f podates
Source: Royal Society of Chemistry journal article supplement (doi:10.1039/b200011c), 2002-01-01
Supplement: b200011c-s3.doc [file b200011c-s3.doc]

Table S3. Selected Least-Squares Plane Data for [LuCrL3](CF3SO3)6(CH3CN)4 (8).

**deviations, Å**

__________________

**Least-squares planes descriptiona max atom**

____________________________________________________________________________

**PaCr pyridine, N(1a) 0.02 C(2a)
BaCr benzimidazole, N(2a), N(3a) 0.05 C(6a)
BaLu benzimidazole, N(4a), N(5a) 0.03 C(19a)
PaLu pyridine, N(6a) 0.02 C(22a)
CaLu carboxamide C(25a), C(26a), O(1a), N(7a) 0.007 C(26a)
PbCr pyridine, N(1b) 0.005 C(2b)
BbCr benzimidazole, N(2b), N(3b) 0.03 C(6b)
BbLu benzimidazole, N(4b), N(5b) 0.01 C(20b)
PbLu pyridine, N(6b) 0.01 C(21b)
CbLu carboxamide C(25b), C(26b), O(1b), N(7b) 0.01 C(26b)
PcCr pyridine, N(1c) 0.004 C(1c)
BcCr benzimidazole, N(2c), N(3c) 0.03 C(12c)
BcLu benzimidazole, N(4c), N(5c) 0.02 N(5c)
PcLu pyridine, N(6c) 0.02 C(25c)
CcLu carboxamide C(25c), C(26c), O(1c), N(7c) 0.003 C(26c)**

Interplane Angles (°)

|  | **BaCr** | **BaLu** | **PaLu** | **CaLu** | **PbCr** | **BbCr** | **BbLu** | **PbLu** | **CbLu** | **PcCr** | **BcCr** | **BcLu** | **PcLu** | **CcLu** |
| --- | --- | --- | --- | --- | --- | --- | --- | --- | --- | --- | --- | --- | --- | --- |
| PaCr | **19** | **77** | **74** | **79** | **84** | **80** | **50** | **43** | **72** | **88** | **89** | **45** | **65** | **49** |
| **BaCr** |  | **85** | **89** | **68** | **80** | **76** | **34** | **25** | **54** | **70** | **72** | **47** | **66** | **79** |
| **BaLu** |  |  | **6** | **35** | **58** | **57** | **70** | **68** | **34** | **41** | **34** | **81** | **73** | **59** |
| **PaLu** |  |  |  | **34** | **55** | **54** | **75** | **73** | **39** | **46** | **40** | **81** | **71** | **61** |
| **CaLu** |  |  |  |  | **29** | **26** | **72** | **64** | **40** | **65** | **59** | **47** | **38** | **30** |
| **PbCr** |  |  |  |  |  | **5** | **83** | **87** | **69** | **86** | **88** | **39** | **20** | **43** |
| **BbCr** |  |  |  |  |  |  | **87** | **83** | **66** | **89** | **85** | **36** | **18** | **38** |
| **BbLu** |  |  |  |  |  |  |  | **11** | **37** | **39** | **44** | **76** | **90** | **56** |
| **PbLu** |  |  |  |  |  |  |  |  | **34** | **44** | **47** | **65** | **79** | **46** |
| **CbLu** |  |  |  |  |  |  |  |  |  | **28** | **25** | **69** | **72** | **42** |
| **PcCr** |  |  |  |  |  |  |  |  |  |  | **7** | **83** | **80** | **70** |
| **BcCr** |  |  |  |  |  |  |  |  |  |  |  | **86** | **84** | **68** |
| **BcLu** |  |  |  |  |  |  |  |  |  |  |  |  | **20** | **27** |
| **PcLu** |  |  |  |  |  |  |  |  |  |  |  |  |  | **34** |

a The rings are denoted as P = pyridine, B = benzimidazole and C = carboxamide, belonging to ligand strand a, b, or c and bound to Lu or Cr. Thus, BbLu is the benzimidazole ring of strand b that is bound to Lu. The error in the dihedral angles between aromatic planes is typically 1°.

|  | **F2** | **F3** | **F4** | **F5** |
| --- | --- | --- | --- | --- |
| **F1a** | **2** | **15** | **15** | **16** |
| **F2** |  | **14** | **14** | **15** |
| **F3** |  |  | **3** | **2** |
| **F4** |  |  |  | **1** |

**a F1: N1a, N1b, N1c; F2: N2a, N2b, N2c; F3: N4a, N4b, N4c; F4: N6a, N6b, N6c; F5: O1a, O1b, O1c**
