# Supplementary material for: A kinetically inert and optically active CrIII partner in thermodynamically self-assembled heterodimetallic non-covalent d–f podates
Source: Royal Society of Chemistry journal article supplement (doi:10.1039/b200011c), 2002-01-01
Supplement: b200011c-s4.doc [file b200011c-s4.doc]

Table S4. Selected Least-Squares Plane Data for [EuCrL3](CF3SO3)6(CH3CN)4 (7).

**deviations, Å**

__________________

**Least-squares planes descriptiona max atom**

____________________________________________________________________________

PaCr pyridine, N(1a) 0.02 C(2a)
BaCr benzimidazole, N(2a), N(3a) 0.06 C(6a)
BaEu benzimidazole, N(4a), N(5a) 0.03 C(19a)
PaEu pyridine, N(6a) 0.02 C(22a)
CaEu carboxamide C(25a), C(26a), O(1a), N(7a) 0.009 C(26a)
PbCr pyridine, N(1b) 0.002 C(4b)
BbCr benzimidazole, N(2b), N(3b) 0.04 C(6b)
BbEu benzimidazole, N(4b), N(5b) 0.01 C(20b)
PbEu pyridine, N(6b) 0.009 C(21b)
CbEu carboxamide C(25b), C(26b), O(1b), N(7b) 0.007 C(26b)
PcCr pyridine, N(1c) 0.006 C(5c)
BcCr benzimidazole, N(2c), N(3c) 0.03 C(6c)
BcEu benzimidazole, N(4c), N(5c) 0.02 C(20c)
PcEu pyridine, N(6c) 0.02 C(25c)
CcEu carboxamide C(25c), C(26c), O(1c), N(7c) 0.002 C(26c)

Interplane Angles (°)

|  | **BaCr** | **BaEu** | **PaEu** | **CaEu** | **PbCr** | **BbCr** | **BbEu** | **PbEu** | **CbEu** | **PcCr** | **BcCr** | **BcEu** | **PcEu** | **CcEu** |
| --- | --- | --- | --- | --- | --- | --- | --- | --- | --- | --- | --- | --- | --- | --- |
| **PaCr** | **18** | **77** | **74** | **78** | **84** | **80** | **49** | **40** | **74** | **87** | **90** | **45** | **67** | **50** |
| **BaCr** |  | **86** | **90** | **66** | **79** | **75** | **33** | **23** | **56** | **70** | **76** | **46** | **66** | **60** |
| **BaEu** |  |  | **5** | **37** | **58** | **58** | **70** | **70** | **31** | **41** | **34** | **82** | **73** | **59** |
| **PaEu** |  |  |  | **37** | **56** | **56** | **75** | **75** | **35** | **46** | **38** | **83** | **72** | **61** |
| **CaEu** |  |  |  |  | **28** | **25** | **71** | **63** | **37** | **66** | **60** | **46** | **37** | **28** |
| **PbCr** |  |  |  |  |  | **5** | **84** | **85** | **66** | **86** | **87** | **40** | **19** | **41** |
| **BbCr** |  |  |  |  |  |  | **89** | **81** | **62** | **89** | **85** | **36** | **17** | **37** |
| **BbEu** |  |  |  |  |  |  |  | **12** | **41** | **39** | **44** | **75** | **89** | **56** |
| **PbEu** |  |  |  |  |  |  |  |  | **39** | **47** | **50** | **62** | **79** | **45** |
| **CbEu** |  |  |  |  |  |  |  |  |  | **30** | **26** | **69** | **71** | **42** |
| **PcCr** |  |  |  |  |  |  |  |  |  |  | **8** | **83** | **79** | **71** |
| **BcCr** |  |  |  |  |  |  |  |  |  |  |  | **85** | **84** | **68** |
| **BcEu** |  |  |  |  |  |  |  |  |  |  |  |  | **22** | **27** |
| **PcEu** |  |  |  |  |  |  |  |  |  |  |  |  |  | **35** |

a The rings are denoted as P = pyridine, B = benzimidazole and C = carboxamide, belonging to ligand strand a, b, or c and bound to Eu or Cr. Thus, BbEu is the benzimidazole ring of strand b that is bound to Eu. The error in the dihedral angles between aromatic planes is typically 1°.

|  | **F2** | **F3** | **F4** | **F5** |
| --- | --- | --- | --- | --- |
| **F1a** | **2** | **16** | **16** | **16** |
| **F2** |  | **14** | **15** | **15** |
| **F3** |  |  | **3** | **3** |
| **F4** |  |  |  | **1** |

**a F1: N1a, N1b, N1c; F2: N2a, N2b, N2c; F3: N4a, N4b, N4c; F4: N6a, N6b, N6c; F5: O1a, O1b, O1c**
