# Supplementary material for: A kinetically inert and optically active CrIII partner in thermodynamically self-assembled heterodimetallic non-covalent d–f podates
Source: Royal Society of Chemistry journal article supplement (doi:10.1039/b200011c), 2002-01-01
Supplement: b200011c-s5.doc [file b200011c-s5.doc]

Table S5 Selected structural dataa for the lutetium coordination sphere in [LuCrL3](CF3SO3)6(CH3CN)4 (8). Values for the europium coordination sphere in [EuCrL3](CF3SO3)6(CH3CN)4 (7) are given between parentheses.

____________________________________________________________________

**Angles  [°]a**

**R1-Ln-R2 179 (178)**

**Angles i [°] (distal tripods)a**

**R2-Ln-N(4a) 52 (53) R1-Ln-O(1a) 47 (48)**

**R2-Ln-N(4b) 51 (51) R1-Ln-O(1b) 47 (48)**

**R2-Ln-N(4c) 52 (53) R1-Ln-O(1c) 47 (47)**

**Angles i [°] (intraligand)a**

**Proj[N(4a)]-Ln-Proj[N(6a)]*b* 55 (53) Proj[N(6b)]-Ln-Proj[O(1b)] 59 (57)**

**Proj[N(6a)]-Ln-Proj[O(1a)] 57 (55) Proj[N(4c)]-Ln-Proj[N(6c)] 52 (51)**

**Proj[N(4b)]-Ln-Proj[N(6b)] 52 (50) Proj[N(6c)]-Ln-Proj[O(1c)] 59 (57)**

**Angles i [°] (interligand)a**

**Proj[N(4a)]-Ln-Proj[O(1b)] 9 (12) Proj[N(4b)]-Ln-Proj[N(6c)] 68 (69)**

**Proj[N(4b)]-Ln-Proj[O(1c)] 9 (12) Proj[N(4c)]-Ln-Proj[N(6a)] 66 (68)**

**Proj[N(4c)]-Ln-Proj[O(1a)] 10 (13) Proj[N(4a)]-Ln-Proj[N(6b)] 67 (69)**

**Proj[N(4c)]-Ln-Proj[N(6b)] 172 (170) Proj[N(6a)]-Ln-Proj[N(6b)] 122 (122)**

**Proj[N(4a)]-Ln-Proj[N(6c)] 173 (172) Proj[N(6b)]-Ln-Proj[N(6c)] 120 (120)**

**Proj[N(4b)]-Ln-Proj[N(6a)] 174 (172) Proj[N(6a)]-Ln-Proj[N(6c)] 119 (119)**

**____________________________________________________________________**

a For the definition of , i and i, see the associated scheme and ref. 46. The error in the angles is typically 1°. b Proj[N(i)] is the projection of N(i) along the R1-R2 direction onto a perpendicular plane passing through the lanthanide atom. R2 = Ln-N4a + Ln-N4b + Ln-N4c and R1 = Ln-O1a + Ln-O1b + Ln-O1c.
