# Supplementary material for: A kinetically inert and optically active CrIII partner in thermodynamically self-assembled heterodimetallic non-covalent d–f podates
Source: Royal Society of Chemistry journal article supplement (doi:10.1039/b200011c), 2002-01-01
Supplement: b200011c-s7.doc [file b200011c-s7.doc]

Table S7 **Selected structural dataa for the chromium coordination sphere in [Cr(bipy)3](PF6)3.25**

____________________________________________________________________

**Angles  [°]a**

**R1-Cr-R2 180**

**Angles i [°] (distal tripods)a**

**R1-Cr-N(1a) 58 R2-Cr-N(2a) 58**

**R1-Cr-N(1b) 58 R2-Cr-N(2b) 58**

**R1-Cr-N(1c) 58 R2-Cr-N(2c) 58**

**Angles i [°] (intraligand)a**

**Proj[N(1a)]-Cr-Proj[N(2a)]b 49**

**Proj[N(1b)]-Cr-Proj[N(2b)] 49**

**Proj[N(1c)]-Cr-Proj[N(2c)] 49**

**Angles i [°] (interligand)a**

**Proj[N(1a)]-Cr-Proj[N(1b)] 120 Proj[N(1a)]-Cr-Proj[N(2b)] 71**

**Proj[N(1a)]-Cr-Proj[N(1c)] 120 Proj[N(1b)]-Cr-Proj[N(2c)] 71**

**Proj[N(1b)]-Cr-Proj[N(1c)] 120 Proj[N(1c)]-Cr-Proj[N(2a)] 71**

**Proj[N(2a)]-Cr-Proj[N(2b)] 120 Proj[N(1a)]-Cr-Proj[N(2c)] 169**

**Proj[N(2a)]-Cr-Proj[N(2c)] 120 Proj[N(1b)]-Cr-Proj[N(2a)] 169**

**Proj[N(2b)]-Cr-Proj[N(2c)] 120 Proj[N(1c)]-Cr-Proj[N(2b)] 169**

**____________________________________________________________________**

**a** For the definition of , *i* and *i*, see the associated scheme and reference 46. The error in the angles is typically 1°. b Proj[N(i)] is the projection of N(i) along the R1-R2 direction onto a perpendicular plane passing through the chromium atom. R1 = Cr-N1a + Cr-N1b + Cr-N1c and R2 = Cr-N2a + Cr-N2b + Cr-N2c.
