# Supplementary material for: A kinetically inert and optically active CrIII partner in thermodynamically self-assembled heterodimetallic non-covalent d–f podates
Source: Royal Society of Chemistry journal article supplement (doi:10.1039/b200011c), 2002-01-01
Supplement: b200011c-s8.doc [file b200011c-s8.doc]

Table S8 Helical pitches *Pij*, linear distances d(F*i*-F*j*) and average twist angle *ij* along the *pseudo*-*C3* axisa in the crystal structures of [EuCrL3](CF3SO3)6(CH3CN)4 (7), [LuCrL3](CF3SO3)6(CH3CN)4 (8) and [LuCoL3](CF3SO3)6(CH3CN)2(H2O).11

|  | | **(HHH)-[EuCrL3]6+** | | | |  |  | | **(HHH)-[LuCrL3]6+** | | | |  |  |  | **(HHH)-[LuCoL3]6+ b** | | | |  |
| --- | --- | --- | --- | --- | --- | --- | --- | --- | --- | --- | --- | --- | --- | --- | --- | --- | --- | --- | --- | --- |
|  | **d(F*i*-F*j*) Å** | | | ***ij*cdegrees** | ***Pij* Å** | | | **d(F*i*-F*j*) Å** | | | ***ij* degrees** | ***Pij* Å** | | | **d(F*i*-F*j*) Å** | | | ***ij* degrees** | ***Pij* Å** | |
| **F1-F2d** | **2.115** | | | **52** | **14.64** | | | **2.107** | | | **52** | **14.59** | | | **2.040** | | | **56** | **13.11** | |
| **F2-F3** | **6.704** | | | **117** | **20.63** | | | **6.758** | | | **117** | **20.79** | | | **6.658** | | | **177** | **20.49** | |
| **F3-F4** | **1.713** | | | **51** | **12.09** | | | **1.709** | | | **53** | **11.61** | | | **1.749** | | | **52** | **12.11** | |
| **F4-F5** | **1.479** | | | **56** | **9.51** | | | **1.433** | | | **58** | **8.89** | | | **1.399** | | | **58** | **8.68** | |
| **F1-F5** | **12.011** | | | **276** | **15.67** | | | **12.007** | | | **280** | **15.44** | | | **11.846** | | | **284** | **15.02** | |
| **Ln...M /Å** | | | **9.3238(8)** | | |  |  | | | **9.3546(9)** | | |  |  |  | | **9.234(2)** | | |  |

a Each helical portion F1-F2, F2-F3, F3-F4 and F4-F5 is characterised by (i) a linear extension d(Fi-Fj) defined by the separation between the facial planes, (ii) an average twist angle *ij* defined by the angular rotation between the projections of Ni and Nj (or Oj) belonging to the same ligand strand onto an intermediate plane passing through the metal (or the midpoint X in Scheme 1) and (iii) its pitch *Pij* defined as the ratio of axial over angular progressions along the helical axis *Pij* = d(Fi-Fj)/(*ij*/360) (*Pij* corresponds to the length of a cylinder containing a single turn of the helix defined by geometrical characteristics d(Fi-Fj) and *ij*).28 b Taken from ref. 11, P34 and P45 have been corrected for deviation of LuIII from the F3 plane. c *ij* are given as *C3*-average values. d F1: N1a, N1b, N1c; F2: N2a, N2b, N2c; F3: N4a, N4b, N4c; F4: N6a, N6b, N6c; F5: O1a, O1b, O1c (see scheme 1)
