# Supplementary material for: A kinetically inert and optically active CrIII partner in thermodynamically self-assembled heterodimetallic non-covalent d–f podates
Source: Royal Society of Chemistry journal article supplement (doi:10.1039/b200011c), 2002-01-01
Supplement: b200011c-s9.doc [file b200011c-s9.doc]

Table S9 Integrated and corrected relative intensities of the Eu(5D07F*J*) and Cr(2E4A2) transitions in [EuCrL3](CF3SO3)6.4H2O (**2**) and [EuCrL3](CF3SO3)6.4CH3CN (7).

| Compd | T / K | ex (nm) |  00 |  01 |  02 |  03 |  04 | 5D07F*J* | 2E 4A2 |
| --- | --- | --- | --- | --- | --- | --- | --- | --- | --- |
| 2 | 10 | 353 | - | 1.00 | 0.9 | - | 0.3 | 2.20 (27%) | 5.90 (73 %) |
| 2 | 295 | 353 | 0.02 | 1.00 | 1.87 | 0.11 | 1.51 | 4.51 (65%) | 2.42 (35%) |
| 2 | 10 | 580.88 | - | 1.00 | 1.49 | - | 1.11 | 3.60 (49 %) | 3.70 (51%) |
| 2 | 295 | 580.56 | - | 1.00 | 1.71 | 0.04 | 1.00 | 3.75 (79%) | 1.01 (21%) |
| 7 | 10 | 353 | 0.06 | 1.00 | 1.49 | 0.05 | 0.81 | 3.41 (37%) | 3.70 (63 %) |
| 7 | 295 | 353 | 0.03 | 1.00 | 1.74 | 0.06 | 0.91 | > 99% | < 1% |
| 7 | 10 | 580.85 | - | 1.00 | 1.87 | 0.08 | 0.98 | 3.93 (60 %) | 2.65 (40%) |
| 7 | 295 | 580.57 | - | 1.00 | 1.97 | 0.06 | 1.02 | 4.05 (94%) | 0.25 (6%) |
